# Supplementary material for: The Prehistoric Indian Ayurvedic Rice Shashtika Is an Extant Early Domesticate With a Distinct Selection History
Source: Front Plant Sci. 2018 Aug 14;9:1203. doi: 10.3389/fpls.2018.01203 (PMC6102419; doi:10.3389/fpls.2018.01203)
Supplement: Supplementary file 2 [file Table_1.xlsx]

## Sheet: Sheet1
Supplementary Table 1a: Intra-collection heterogeneity assessment in 72 Njavara collections and the list of microsatellite primers used in the initial screening. Three individuals each from the 72 uncharacterized Njavara collections, amounting to a total of 216 individuals were fingerprinted using 30 of the 70 selected microsatellite loci (Supplementary Table 1b below) and the fingerprint profile…
Sl.No	Accession	Glume colour	Place of collection	District	Individual name
1	N 29	Black	Muttil	Wayanad	N 29-1-3
					N 29-2-1
					N 29-3-2
2	N 31	Black	Ezhuvantala	Palakkad	N 31-1-3
					N 31-2-2
					N 31-3-3*
3	N 32	Yellow	Thozhukkad	Palakkad	N 32-1-3
					N 32-2-2
					N 32-3-2
4	N 33	Black	Thozhukkad	Palakkad	N 33-1-1
					N 33-2-2
					N 33-3-3
5	N 34	Yellow	Kothachira	Palakkad	N 34-1-3
					N 34-2-2
					N 34-3-2
6	N 35	Black	Kothachira	Palakkad	N 35-1-2
					N 35-2-2
					N 35-3-1
7	N 36	Black	Thrikederi	Palakkad	N 36-1-1
					N 36-2-2
					N 36-3-1
8	N 37	Yellow	Puliyoor	Alappuzha	N 37-1-3
					N 37-2-1
					N 37-3-1
9	N 38	Black	Chittur	Palakkad	N 38-1-1
					N 38-2-1
					N 38-3-1
10	N 39	Black	Thirurangadi	Malappuram	N 39-1-1
					N 39-2-2
					N 39-3-1
11	N 40	Yellow	Thirurangadi	Malappuram	N 40-1-1
					N 40-2-1
					N 40-3-3
12	N 41	Yellow	Thirurangadi	Malappuram	N 41-1-1*
					N 41-2-3
					N 41-3-2
13	N 43	Yellow	Thiruvegappura	Palakkad	N 43-1-1
					N 43-2-2
					N 43-3-1
14	N 44	Black	Naripparambu	Malappuram	N44-1-1
					N44-2-2
					N44-3-3
15	N 45	Black	Karimkutty	Wayanad	N 45-1-1
					N 45-1-2
					N 45-2-2
16	N 47	Yellow	Puthenchira	Thrissur	N 47-1-3
					N 47-2-1*
					N 47-3-1
17	N 48	Yellow	Pulassery	Palakkad	N 48-1-3
					N 48-2-1
					N 48-3-2
18	N 49	Yellow	Pulassery	Palakkad	N 49-1-1
					N 49-2-3
					N 49-3-1
19	N 50	Black	Chuloor	Kozhikode	N 50-1-1
					N 50-2-3
					N 50-3-3
20	N 51	Yellow	Kalliasseri	Kannur	N 51-1-2
					N 51-2-2
					N 51-3-3
21	N 52	Black	Chuloor	Kozhikode	N 52-1-1
					N 52-2-2
					N 52-3-3
22	N 54	Black	Mananthavady	Wayanad	N 54-1-2*
					N 54-2-3
					N 54-3-1
23	N 55	Black	Pattanjeri	Palakkad	N 55-1-1
					N 55-2-1*
					N 55-3-1
24	N 56	Black	Ambalappara	Palakkad	N 56-1-2
					N 56-2-2
					N 56-3-3
25	N 57	Yellow	Thrutala	Palakkad	N 57-1-1
					N 57-2-3
					N 57-3-3
26	N 58	Black	Chuloor	Kozhikode	N 58-1-2
					N 58-2-2
					N 58-3-3
27	N 59	Black	Pozhuthana	Wayanad	N 59-1-1
					N 59-2-2
					N 59-3-3*
28	N 60	Black	Polpully	Palakkad	N 60-1-1
					N 60-2-3
					N 60-3-3*
29	N 61	Black	Pozhuthana	Wayanad	N 61-1-1
					N 61-2-3
					N 61-3-2
30	N 62	Black	Mundakutty	Wayanad	N 62-1-1
					N 62-2-1
					N 62-3-1
31	N 63	Black	Peelikode	Kasargode	N 63-1-1*
					N 63-2-3
					N 63-3-2
32	N 64	Yellow	Kecheri	Thrissur	N 64-1-1
					N 64-2-3
					N 64-3-2
33	N 65	Yellow	Mala trutala	Palakkad	N65-1-1
					N65-2-2*
					N65-3-1*
34	N 66	Yellow	Edattummal	Kasargode	N 66-1-1
					N 66-1-2
					N 66-1-3*
35	N 68	Yellow	MG kavu	Thrissur	N 68-1-1
					N 68-2-3
					N 68-3-1
36	N 69	Black	Pattanchery	Palakkad	N 69-1-2
					N 69-2-2
					N 69-3-1*
37	N 70	Yellow	Payyannur	Kannur	N 70-1-1
					N 70-2-2
					N 70-3-1*
38	N 71	Black	Kothamangalam	Ernakulam	N 71-1-2
					N 71-2-3
					N 71-3-3
39	N 72	Yellow	Thanur	Malappuram	N 72-1-3*
					N 72-2-1*
					N 72-3-2*
40	N 73	Black	Iritty	Kannur	N 73-1-1
					N 73-2-1*
					N 73-3-1
41	N 74	Yellow	Koothuparambu	Kannur	N 74-1-3
					N 74-2-1*
					N 74-3-1
42	N 75	Black	Koothuparambu	Kannur	N 75-1-3
					N 75-2-1
					N 75-3-2
43	N 77	Yellow	Payyannur	Kannur	N 77-1-1
					N 77-2-2*
					N 77-3-2*
44	N 78	Yellow	Cholode	Kannur	N 78-1-1
					N 78-2-1
					N 78-3-1
45	N 81	Black	Peruvayal	Kozhikode	N 81-1-1
					N 81-2-2
					N 81-3-1
46	N82	Black	Peruvayal	Kozhikode	N82-1-1
					N82-2-3
					N82-3-1*
47	N 83	Black	Peruvayal	Kozhikode	N 83-1-3
					N 83-2-2
					N 83-3-3*
48	N 84	Black	Aduvadu	Kozhikode	N 84-1-3
					N 84-2-1
					N 84-3-3
49	N 85	Black	Narikkuni	Kozhikode	N 85-1-1
					N 85-2-3
					N 85-3-2
50	N 86	Black	Chathamangalm	Kozhikode	N 86-1-1
					N 86-2-3
					N 86-3-3*
51	N 87	Yellow	Parappanangadi	Malappuram	N 87-1-1
					N 87-2-2*
					N 87-3-3
52	N 88	Yellow	Thanur	Malappuram	N 88-1-3
					N 88-2-2
					N 88-3-1
53	N 89	Yellow	Thanur	Malappuram	N 89-1-3*
					N 89-2-1*
					N 89-3-3*
54	N 90	Yellow	Thanur	Malappuram	N 90-1-1*
					N 90-2-2*
					N 90-3-1
55	N 91	Yellow	Kavathikulam	Malappuram	N 91-1-1
					N 91-2-2
					N 91-3-1
56	N 92	Yellow	Idappal	Malappuram	N 92-1-1
					N 92-2-1*
					N 92-3-3*
57	N 93	Yellow	Idappal	Malappuram	N 93-1-1
					N 93-2-2*
					N 93-3-2*
58	N 94	Black	Idappal	Malappuram	N 94-1-1
					N 94-2-1
					N 94-3-2
59	N 95	Yellow	Thuyyam	Malappuram	N 95-1-3
					N 95-2-2
					N 95-3-1
60	N 96	Black	Idappal	Malappuram	N-96-1-3
					N-96-2-1
					N-96-3-1
61	N 97	Yellow	Idappal	Malappuram	N 97-1-1*
					N 97-2-2*
					N 97-3-2
62	N 98	Black	Ponnani	Malappuram	N 98-1-1
					N 98-2-2
					N 98-3-3
63	N 99	Yellow	Kunnamkulam	Thrissur	N 99-1-1
					N 99-2-3
					N 99-3-2
64	N 101	Yellow	Kunnamkulam	Thrissur	N 101-1-1
					N 101-2-3
					N 101-3-3
65	N106	Yellow	Chekannur	Malappuram	N106-1- 1
					N106-2-3*
					N106-3-2*
66	N 107	Black	Kalliasseri	Kannur	N 107-1-1*
					N 107-2-1
					N 107-1-2*
67	N 109	Black	Kunnamkulam	Thrissur	N 109-1-1
					N 109-2-3
					N 109-3-1
68	N 110	Yellow	Nedumbassery	Ernakulam	N 110-1-1
					N 110-2-3*
					N 110-3-3*
69	N 111	Yellow	Karimkutty	Wayanad	N 111-1-3
					N 111-2-1*
					N 111-3-1
70	N 113	Black	Pulassery	Palakkad	N 113-1-3*
					N 113-2-1*
					N 113-3-2
71	N 115	Black	Kecheri	Thrissur	N 115-1-3
					N 115-2-1
					N 115-3-3
72	N 116	Black	MG kavu	Thrissur	N 116-1-2
					N 116-2-3
					N 116-3-1*
Supplementary Table 1b. List of microsatellite loci used for initial primer screening. A total of 340 microsatellite loci chosen from the public domain (http://www.gramene.org) were used in initial screening. We selected the loci in such a way to cover the entire rice genome. Care was also taken to choose the loci yielding high polymorphism information content (PIC). Since the primers available i…
Sl. No	Loci	Chromosome	Repeat		PIC		Range (bp)		Forward primer (5' - 3')		Reverse primer (5' - 3')		Tm (0C)		Reference
1	RM1*#	1	(AG)26		0.78		67-119		gcgaaaacacaatgcaaaaa		gcgttggttggacctgac		55		Panaud et al. 1996a
2	RM5	1	(GA)14		0.77		108-130		tgcaacttctagctgctcga		gcatccgatcttgatggg		55		Panaud et al. 1996
3	RM14	1	(GA) 18		0.77		108-130		ccgaggagaggagttcgac		gtgccaatttcctcgaaaaa		55		Panaud et al. 1996
4	RM23*	1	(GA)15		0.81		134-150		cattggagtggaggctgg		gtcaggcttctgccattctc		55		Chen et al. 1997
5	RM104*	1	(GA)9		0.62		222-238		ggaagaggagagaaagatgtgtgtcg		tcaacagacacaccgccaccgc		61		Akagi et al. 1996b
6	RM128	1	(GAA)9		0.63		148-166		agcttgggtgatttcttggaagcg		acgacgaggagtcgccgtgcag		55		Akagi et al. 1996
7	RM129	1	(CGG)8		0.57		203-214		tctctccggagccaaggcgagg		cgagccacgacgcgatgtaccc		55		Temnykh et al. 2000d
8	RM212	1	(CT)24		0.72		112-134		ccactttcagctactaccag		cacccatttgtctctcattatg		55		Chen et al. 1997c
9	RM226	1	(AT)38		0.82		264-342		agctaaggtctgggagaaacc		aagtaggatggggcacaagctc		55		Akagi et al. 1996
10	RM237	1	(CT)18		0.72		105-153		caaatcccgactgctgtcc		tgggaagagagcactacagc		55		Chen et al. 1997
11	RM243	1	(CT)18		0.77		96-122		gatctgcagactgcagttgc		agctgcaacgatgttgtcc		55		Chen et al. 1997
12	RM246	1	(CT)20		0.81		97-118		gagctccatcagccattcag		ctgagtgctgctgcgact		55		Chen et al. 1997
13	RM259	1	(CT)17		0.77		133-186		tggagtttgagaggaggg		cttgttgcatggtgccatgt		55		Chen et al. 1997
14	RM272	1	(GA)9		0.35		119-121		aattggtagagaggggagag		acatgccattagagtcaggc		55		Temnykh et al. 2000
15	RM283*#	1	(GA)18		0.61		130-176		gtctacatgtacccttgttggg		cggcatgagagtctgtgatg		55		Temnykh et al. 2000
16	RM302*#	1	(GT)30(AT)8		0.76		120-191		tcatgtcatctaccatcacac		atggagaagatggaatacttgc		55		Temnykh et al. 2000
17	RM312	1	(ATTT)4(GT)9		0.68		86-106		gtatgcatatttgataagag		aagtcaccgagtttaccttc		55		Temnykh et al. 2000
18	RM315	1	(AT)4(GT)10		0.57		133-139		gaggtacttcctccgtttcac		agtcagctcactgtgcagtg		55		Temnykh et al. 2000
19	RM323	1	(CAT)5		0.47		241-244		caacgagcaaatcaggtcag		gttttgatcctaaggctgctg		55		Temnykh et al. 2000
20	RM403	1	(GA)8		0.5		239-241		gctgtgcatgcaagttcatg		atggtcctcatgttcatggc		55		Temnykh et al. 2001e
21	RM428	1	(AG)15		0.79		262-288		aacagatggcatcgtcttcc		cgctgcatccactactgttg		55		Temnykh et al. 2001
22	RM431*	1	(AG)16		0.76		233-261		tcctgcgaactgaagagttg		agagcaaaaccctggttcac		55		Temnykh et al. 2001
23	RM449	1	(AG)12		0.78		116-138		ttgggaggtgttgataaggc		accaccagcgtctctctctc		55		Temnykh et al. 2001
24	RM472	1	(GA)21		0.71		256-272		ccatggcctgagagagagag		agctaaatggccatacggtg		55		Temnykh et al. 2001
25	RM486	1	(CT)14		0.75		100-112		cccccctctctctctctctc		tagccacatcaacagcttgc		55		Temnykh et al. 2001
26	RM488	1	(GA)17		0.84		157-195		cagctagggttttgaggctg		tagcaacaaccagcgtatgc		55		Temnykh et al. 2001
27	RM490	1	(CT)13		0.81		93-107		atctgcacactgcaaacacc		agcaagcagtgctttcagag		55		Temnykh et al. 2001
28	RM493	1	(CTT)9		0.72		211-259		tagctccaacaggatcgacc		gtacgtaaacgcggaaggtg		55		Temnykh et al. 2001
29	RM495	1	(CTG)7		0.59		148-160		aatccaaggtgcagagatgg		caacgatgacgaacacaacc		55		Temnykh et al. 2001
30	RM562	1	(AAG)13		0.72		219-267		cacaacccacaaacagcaag		cttcccccaaagttttagcc		55		Temnykh et al. 2001
31	RM580	1	(CTT)19		0.84		200-230		gatgaactcgaatttgcatcc		cactcccatgtttggctcc		55		Temnykh et al. 2001
32	RM583	1	(CTT)20		0.77		156-192		agatccatccctgtggagag		gcgaactcgcgttgtaatc		55		Temnykh et al. 2001
33	RM600	1	(TTA)19		0.88		208-247		aaacgtgtgttagcctgttagg		catatgctagtggtgctagcg		55		Temnykh et al. 2001
34	RM84	1	(TCT)10		0.56		111-126		taagggtccatccacaagatg		ttgcaaatgcagctagagtac		55		Chen et al. 1997
35	RM6	2	(AG)16		0.73		147-165		gtcccctccacccaattc		tcgtctactgttggctgcac		55		Panaud et al. 1996
36	RM48*#	2	(GA)17		0.82		199-221		tgtcccactgctttcaagc		cgagaatgagggacaaataacc		55		Chen et al. 1997
37	RM106	2	(GAA)5		0.5		282-294		cgtcttcatcatcgtcgccccg		ggcccatcccgtcgtggatctc		55		Temnykh et al. 2000
38	RM109*	2	(AG)16		0.66		89-101		gccgccggagagggagagagag		ccccgacgggatctccatcgtc		67		Temnykh et al. 2000
39	RM110	2	(GA)15		0.73		138-156		tcgaagccatccaccaacgaag		tccgtacgccgacgaggtcgag		55		Temnykh et al. 2000
40	RM138	2	(GT)14		0.47		203-217		agcgcaacaaccaatccatccg		aagaagctgcctttgacgctatgg		55		Akagi et al. 1996
41	RM154	2	(GA)21		0.8		148-230		accctctccgcctcgcctcctc		ctcctcctcctgcgaccgctcc		61		Akagi et al. 1996
42	RM174	2	(AGG)7(GA)10		0.63		207-222		agcgacgccaagacaagtcggg		tccacgtcgatcgacacgacgg		67		Temnykh et al. 2000
43	RM207	2	(CT)25		0.84		71-139		ccattcgtgagaagatctga		cacctcatcctcgtaacgcc		55		Chen et al. 1997
44	RM208	2	(CT)17		0.68		166-180		tctgcaagccttgtctgatg		taagtcgatcattgtgtggacc		55		Chen et al. 1997
45	RM221	2	(TC)4T3C3(TC)(CT)2		0.59		187-193		acatgtcagcatgccacatc		tgcaagaatctgacccgg		55		Chen et al. 1997
46	RM240	2	(CT)21		0.7		121-137		ccttaatgggtagtgtgcac		tgtaaccattccttccatcc		55		Chen et al. 1997
47	RM250*#	2	(CT)17		0.6		154-174		ggttcaaaccaagctgatca		gatgaaggccttccacgcag		55		Chen et al. 1997
48	RM266*	2	(GA)19		0.87		121-137		tagtttaaccaagactctc		ggttgaacccaaatctgca		55		Temnykh et al. 2000
49	RM279	2	(GA)16		0.73		148-174		gcgggagagggatctcct		ggctaggagttaacctcgcg		55		Temnykh et al. 2000
50	RM300	2	(GTT)14		0.7		121-163		gcttaaggacttctgcgaacc		caacagcgatccacatcatc		55		Temnykh et al. 2000
51	RM324	2	(CAT)21		0.76		135-180		ctgattccacacacttgtgc		gattccacgtcaggatcttc		55		Temnykh et al. 2000
52	RM423*	2	(TTC)9		0.7		270-294		agcacccatgccttatgttg		cctttttcagtagccctccc		55		Temnykh et al. 2001
53	RM424*#	2	(CAT)9		0.76		239-290		tttgtggctcaccagttgag		tggcgcattcatgtcatc		55		Temnykh et al. 2001
54	RM450	2	(AG)17		0.8		133-143		aaaccacagtagtacgccgg		tccatccacatctccctctc		55		Temnykh et al. 2001
55	RM452*#	2	(GTC)9		0.66		192-213		ctgatcgagagcgttaaggg		gggatcaaaccacgtttctg		55		Temnykh et al. 2001
56	RM475	2	(TATC)8		0.77		188-235		cctcacgattttcctccaac		acggtgggattagactgtgc		55		Temnykh et al. 2001
57	RM482	2	(AT)9		0.73		184-196		tctgaaagcctgactcatcg		gtcaattgcagtgccctttc		55		Temnykh et al. 2001
58	RM485	2	(TA)18		0.84		291-361		cacactttccagtcctctcc		catcttcctctcttcggcac		55		Temnykh et al. 2001
59	RM498	2	(CA)10		0.6		211-219		aatctgggcctgctcttttc		tcctagggtgaagaaagggg		55		Temnykh et al. 2001
60	RM525	2	(AAG)12		0.72		107-137		ggcccgtccaagaaatattg		cggtgagacagaatccttacg		55		Temnykh et al. 2001
61	RM550	2	(CCT)8		0.56		228-234		ctgagctctggtccgaagtc		ggtggtggaagaacaggaag		55		Temnykh et al. 2001
62	RM555	2	(AG)11		0.6		223-231		ttggatcagccaaaggagac		cagcattgtggcatggatac		55		Temnykh et al. 2001
63	RM7	3	(GA)19		0.75		168-182		ttcgccatgaagtctctcg		cctcccatcatttcgttgtt		55		Panaud et al. 1996
64	RM16	3	(TCG)5(GA)16		n.a.		168-230		cgctagggcagcatctaaa		aacacagcaggtacgcgc		55		Panaud et al. 1996
65	RM22	3	(GA)22		0.79		183-201		ggtttgggagcccataatct		ctgggcttctttcactcgtc		55		Panaud et al. 1996
66	RM55	3	(GA)17		0.64		216-247		ccgtcgccgtagtagagaag		tcccggttattttaaggcg		55		Chen et al. 1997
67	RM85	3	(TGG)5(TCT)12		0.59		85-107		ccaaagatgaaacctggattg		gcacaaggtgagcagtcc		55		Temnykh et al. 2000
68	RM132	3	(CGG)8		0.5		83-86		atcttgttgtttcggcggcggc		catggcgagaatgcccacgtcc		67		Temnykh et al. 2000
69	RM135*	3	(CGG)10		0.62		119-131		ctctgtctcctcccccgcgtcg		tcagcttctggccggcctcctc		61		Akagi et al. 1996
70	RM143	3	(CGG)7		0.6		195-207		gtcccgaaccctagcccgaggg		agaggccctccacatggcgacc		67		Temnykh et al. 2000
71	RM156	3	(CGG)8		0.5		150-160		gccgcaccctcactccctcctc		tcttgccggagcgcttgaggtg		67		Temnykh et al. 2000
72	RM227	3	(CT)10		0.57		99-107		acctttcgtcataaagacgag		gattggagagaaaagaagcc		55		Chen et al. 1997
73	RM231*	3	(CT)16		0.7		169-191		ccagattatttcctgaggtc		cacttgcatagttctgcattg		55		Chen et al. 1997
74	RM251	3	(CT)29		0.78		114-150		gaatggcaatggcgctag		atgcggttcaagattcgatc		55		Chen et al. 1997
75	RM232	3	(CT)24		0.78		142-166		ccggtatccttcgatattgc		ccgacttttcctcctgacg		55		Chen et al. 1997
76	RM282	3	(GA)15		0.62		128-136		ctgtgtcgaaaggctgcac		cagtcctgtgttgcagcaag		55		Temnykh et al. 2000
77	RM293*	3	(GT)20		0.7		202-211		tcgttgggaggtatggtacc		ctttatctgatccttgggaagg		55		Temnykh et al. 2000
78	RM319	3	(GT)10		0.47		132=134		atcaaggtacctagaccaccac		tcctggtgcagctatgtctg		55		Temnykh et al. 2000
79	RM338	3	(CTT)6		0.26		178-184		cacaggagcaggagaagagc		ggcaaaccgatcactcagtc		55		Temnykh et al. 2000
80	RM416	3	(GA)9		0.43		112-114		gggagttagggttttggagc		tccagtttcacactgcttcg		55		Temnykh et al. 2001
81	RM422	3	(AG)30		0.84		350-389		ttcaacctgcatccgctc		ccatccaaatcagcaacagc		55		Temnykh et al. 2001
82	RM426	3	(CA)10		0.85		150-224		atgagatgagttcaaggccc		aactctgtacctccatcgcc		55		Temnykh et al. 2001
83	RM442	3	(AAG)10		0.69		257-269		cttaagccgatgcatgaagg		atcctatcgacgaatgcacc		55		Temnykh et al. 2001
84	RM468	3	(TAT)8		0.56		259-268		cccttccttgttgtggctac		tgatttctgagagccaaccc		55		Temnykh et al. 2001
85	RM487	3	(AC)10		0.57		170-176		tttctcgaacgcaggagaac		gctaggaacatcaacccgag		55		Temnykh et al. 2001
86	RM489	3	(ATA)8		0.6		223-289		acttgagacgatcggacacc		tcacccatggatgttgtcag		55		Temnykh et al. 2001
87	RM514*#	3	(AC)12		0.81		229-278		agattgatctcccattcccc		cacgagcatattactagtgg		55		Temnykh et al. 2001
88	RM517*#	3	(CT)15		0.76		260-282		ggcttactggcttcgatttg		cgtctcctttggttagtgcc		55		Temnykh et al. 2001
89	RM520	3	(AG)10		0.56		247-269		aggagcaagaaaagttcccc		gccaatgtgtgacgcaatag		55		Temnykh et al. 2001
90	RM545*	3	(GA)30		0.84		212-230		caatggcagagacccaaaag		ctggcatgtaacgacagtgg		55		Temnykh et al. 2001
91	RM571	3	(GT)11(AG)13		0.77		282-194		ggaggtgaaagcgaatcatg		cctgctgctctttcatcagc		55		Temnykh et al. 2001
92	RM119	4	(GTC)6		0.56		166-172		catccccctgctgctgctgctg		cgccggatgtgtgggactagcg		67		Temnykh et al. 2000
93	RM124*#	4	(TC)10		0.65		257-289		atcgtctgcgttgcggctgctg		catggatcaccgagctcccccc		67		Temnykh et al. 2000
94	RM127	4	(AGG)8		0.57		209-226		gtgggatagctgcgtcgcgtcg		aggccagggtgttggcatgctg		55		Temnykh et al. 2000
95	RM131	4	(CT)9		0.7		209-217		tcctccctcccttcgcccactg		cgatgttcgccatggctgctcc		61		Temnykh et al. 2000
96	RM142	4	(CGG)7		0.47		235-238		ctcgctatcgccatcgccatcg		tcgagccatcgctggatggagg		67		Temnykh et al. 2000
97	RM177	4	(AG)8		0.36		192-195		ccctcttagacagaggccagaggg		gtagccgaagatgaggccgccg		61		Temnykh et al. 2000
98	RM185	4	(AGG)9		0.5		194-197		agttgttgggagggagaaaggcc		aggaggcgacggcgatgtcctc		61		Temnykh et al. 2000
99	RM241	4	(CT)31		0.68		102-142		gagccaaataagatcgctga		tgcaagcagcagatttagtg		55		Chen et al. 1997
100	RM252*	4	(CT)19		n.a.		196-262		ttcgctgacgtgataggttg		atgacttgatcccgagaacg		55		Chen et al. 1997
101	RM255	4	(AGG)5(AG)2-(GA)16		0.64		141-151		tgttgcgtgtggagatgtg		cgaaaccgctcagttcaac		55		Chen et al. 1997
102	RM261	4	C9(CT)8		0.7		122-126		ctacttctccccttgtgtcg		tgtaccatcgccaaatctcc		55		Chen et al. 1997
103	RM273	4	(GA)11		0.34		199-207		gaagccgtcgtgaagttacc		gtttcctacctgatcgcgac		55		Temnykh et al. 2000
104	RM280*	4	(GA)16		0.75		148-181		acacgatccactttgcgc		tgtgtcttgagcagccagg		55		Temnykh et al. 2000
105	RM303	4	[AC(AT)2-10]9(GT)7(ATGT)6		0.78		143-205		gcatggccaaatattaaagg		ggttggaaatagaagttcggt		55		Temnykh et al. 2000
106	RM307	4	(AT)14(GT)21		0.83		116-191		gtactaccgacctaccgttcac		ctgctatgcatgaactgctc		55		Temnykh et al. 2000
107	RM317	4	(GC)4(GT)18		0.6		146-166		catacttaccagttcaccgcc		ctggagagtgtcagctagttga		55		Temnykh et al. 2000
108	RM335	4	(CTT)25		0.84		104-155		gtacacacccacatcgagaag		gctctatgcgagtatccatgg		55		Temnykh et al. 2000
109	RM348	4	(CAG)7		0.47		130-139		ccgctactaatagcagagag		ggagctttgttcttgcgaac		55		Bligh et al. 1999f
110	RM349	4	(GA)16		0.7		132-146		ttgccattcgcgtggaggcg		gtccatcatccctatggtcg		55		Bligh et al. 1999
111	RM417	4	(GA)7		0.5		263-265		cggatccaagaaacagcag		ttcggtatcctccacacctc		55		Temnykh et al. 2001
112	RM451	4	(GAT)8		0.5		201-207		gatcccctccgtcaaacac		cccttctcctttcctcaacc		55		Temnykh et al. 2001
113	RM470	4	(CTT)14		0.67		83-122		tcctcatcggcttcttcttc		agaacccgttctacgtcacg		55		Temnykh et al. 2001
114	RM471	4	(GA)12		0.75		108-120		acgcacaagcagatgatgag		gggagaagacgaatgtttgc		55		Temnykh et al. 2001
115	RM518*#	4	(TC)15		0.79		153-187		ctcttcactcactcaccatgg		atccatctggagcaagcaac		55		Temnykh et al. 2001
116	RM537	4	(CCG)9		0.61		230-236		ccgtccctctctctcctttc		acagggaaaccatcctcctc		55		Temnykh et al. 2001
117	RM551*	4	(AG)18		0.81		168-214		agcccagactagcatgattg		gaaggcgagaaggatcacag		55		Temnykh et al. 2001
118	RM559	4	(AACA)6		0.5		156-160		acgtacacttggccctatgc		atgggtgtcagtttgcttcc		55		Temnykh et al. 2001
119	RM567*	4	(GA)21		0.8		239-261		atcagggaaatcctgaaggg		ggaaggagcaatcaccactg		55		Temnykh et al. 2001
120	RM13	5	(GA)6-(GA)16		0.72		131-147		tccaacatggcaagagagag		ggtggcattcgattccag		55		Panaud et al. 1996
121	RM26	5	(GA)15		0.6		102-112		gagtcgacgagcggcaga		ctgcgagcgacggtaaca		55		Chen et al. 1997
122	RM31	5	(GA)15		0.72		141-153		gatcacgatccactggagct		aagtccattactctcctccc		55		Chen et al. 1997
123	RM87	5	(CTT)3T(CTT)11		0.73		124-151		cctctccgatacaccgtatg		gcgaaggtacgaaaggaaag		55		Temnykh et al. 2000
124	RM122	5	(GA)7A(GA)2A(GA)11		n.a.		227-233		gagtcgatgtaatgtcatcagtgc		gaaggaggtatcgctttgttggac		na		Wu &Tanksley 1993
125	RM146	5	(CT)11-(CT)7		0.46		340-348		ctattattccctaacccccataccctcc		agagccactgcctgcaaggccc		55		Temnykh et al. 2000
126	RM153	5	(GAA)9		0.64		189-204		gcctcgagcatcatcatcag		atcaacctgcacttgcctgg		55		Akagi et al. 1996
127	RM159*	5	(GA)19		0.87		238-252		ggggcactggcaagggtgaagg		gcttgtgcttctctctctctctctctctc		55		Temnykh et al. 2000
128	RM161	5	(AG)20		0.64		154-187		tgcagatgagaagcggcgcctc		tgtgtcatcagacggcgctccg		61		Temnykh et al. 2000
129	RM164	5	(GT)16TT(GT)4		n.a.		246-304		tcttgcccgtcactgcagatatcc		gcagccctaatgctacaattcttc		na		Wu &Tanksley 1993
130	RM169	5	(GA)12		0.71		164-194		tggctggctccgtgggtagctg		tcccgttgccgttcatccctcc		67		Temnykh et al. 2000
131	RM173	5	(GA)9		0.43		186-188		cctacctcgcgatccccccctc		ccatgaggaggaggcggcgatc		67		Temnykh et al. 2000
132	RM178*#	5	(GA)5(AG)8		0.61		112-131		tcgcgtgaaagataagcggcgc		gatcaccgttccctccgcctgc		67		Temnykh et al. 2000
133	RM188	5	(CA)8		0.26		210-212		tccgcctctcctctcgcttccc		gcaacgcacaaccgaaccgagc		61		Temnykh et al. 2000
134	RM267	5	(GA)21		0.77		137-160		tgcagacatagagaaggaagtg		agcaacagcacaacttgatg		55		Temnykh et al. 2000
135	RM289	5	G11(GA)16		0.63		88-180		ttccatggcacacaagcc		ctgtgcacgaacttccaaag		55		Temnykh et al. 2000
136	RM334	5	(CTT)20		0.83		146-197		gttcagtgttcagtgccacc		gactttgatctttggtggacg		55		Temnykh et al. 2000
137	RM413	5	(AG)11		0.76		71-114		ggcgattcttggatgaagag		tccccaccaatcttgtcttc		55		Temnykh et al. 2000
138	RM421	5	(AGAT)6		0.52		234-242		agctcaggtgaaacatccac		atccagaatccattgacccc		55		Temnykh et al. 2001
139	RM430*#	5	(GA)25		0.72		141-181		aaacaacgacgtccctgatc		gtgcctccgtggttatgaac		55		Temnykh et al. 2001
140	RM437	5	(AG)13		0.66		265-277		acaccaaccagatcagggag		tgctcgtcaatggtgagttc		55		Temnykh et al. 2001
141	RM440*	5	(CTT)22		0.86		160-232		catgcaacaacgtcaccttc		atggttggtaggcaccaaag		55		Temnykh et al. 2001
142	RM459	5	(CATC)6		0.67		55-79		ctgcaatgctgcatgacc		cactttctctgcagcaccag		55		Temnykh et al. 2001
143	RM507*#	5	(AAGA)7		0.49		234-257		cttaagctccagccgaaatg		ctcaccctcatcatcgcc		55		Temnykh et al. 2001
144	RM509	5	(TC)11		0.63		133-145		tagtgagggagtggaaacgg		atcgtccccacaatctcatc		55		Temnykh et al. 2001
145	RM538	5	(GA)14		0.77		272-282		ggtcgttgaagcttaccagc		acaagctctcaaaactcgcc		55		Temnykh et al. 2001
146	RM548	5	(CT)12		0.74		257-271		tcggtgagaaactgagagtacg		aaggaggccatctcaatgtg		55		Temnykh et al. 2001
147	RM592	5	(ATT)20		0.88		210-400		tctttggtatgaggaacacc		agagatccggtttgttgtaa		55		Temnykh et al. 2001
148	RM103	6	(GAA)5		0.7		334-340		cttccaattcaggccggctggc		cgccacagctgaccatgcatgc		55		Temnykh et al. 2000
149	RM111	6	(GA)9		0.54		118-126		cacaacctttgagcaccgggtc		acgcctgcagcttgatcaccgg		55		Temnykh et al. 2000
150	RM115	6	(AG)7		0.47		186-188		ttgccgcagtggccgttaccac		aggaggcggcggaaatggaagg		61		Temnykh et al. 2000
151	RM121	6	(CT)7		0.6		258-264		accgtcgccttccactttcccc		ttcggggttgccggtgatgttg		55		Temnykh et al. 2000
152	RM133*#	6	(CT)8		0.56		226-237		ttggattgttttgctggctcgc		ggaacacggggtcggaagcgac		61		Temnykh et al. 2000
153	RM136	6	(AGG)7		0.62		98-104		gagagctcagctgctgcctctagc		gaggagcgccacggtgtacgcc		55		Temnykh et al. 2000
154	RM141	6	(CT)12		0.54		126-145		caccaccaccaccacgcctctc		tcttggagaggaggaggcgcgg		55		Temnykh et al. 2000
155	RM162	6	(AC)20		0.54		191-244		gccagcaaaaccagggatccgg		caaggtcttgtgcggcttgcgg		61		Temnykh et al. 2000
156	RM170	6	(CCT7		0.69		106-119		tcgcgcttcttcctcgtcgacg		cccgcttgcagaggaagcagcc		55		Temnykh et al. 2000
157	RM176	6	(CCG)8		0.54		133-139		cggctcccgctacgacgtctcc		agcgatgcgctggaagaggtgc		67		Temnykh et al. 2000
158	RM190	6	(CT)11		0.8		104-124		ctttgtctatctcaagacac		ttgcagatgttcttcctgatg		55		Akagi et al. 1996
159	RM204*	6	(CT)44		0.83		106-194		gtgactgacttggtcataggg		gctagccatgctctcgtacc		55		Chen et al. 1997
160	RM217	6	(CT)20		0.83		120-166		atcgcagcaatgcctcgt		gggtgtgaacaaagacac		55		Chen et al. 1997
161	RM225*#	6	(CT)18		0.77		125-145		tgcccatatggtctggatg		gaaagtggatcaggaaggc		55		Chen et al. 1997
162	RM253	6	(GA)25		0.78		125-143		tccttcaagagtgcaaaacc		gcattgtcatgtcgaagcc		55		Chen et al. 1997
163	RM345	6	(CT)18		0.77		125-145		attggtagctcaatgcaagc		gtgcaacaaccccacatg		55		Chen et al. 1997
164	RM400	6	(ATA)63		0.83		195-321		acaccaggctacccaaactc		cggagagatctgacatgtgg		55		Temnykh et al. 2001
165	RM402	6	(ATA)7		0.5		133-136		gagccatggaaagatgcatg		tcagctggcctatgacaatg		55		Temnykh et al. 2001
166	RM412	6	(GA)22		0.55		170-198		cacttgagaaagttagtgcagc		cccaaacacacccaaatac		55		Temnykh et al. 2001
167	RM435	6	(ATG)7		0.47		163-166		attacgtgcatgtctggctg		cgtacctgaccatgcatctg		55		Temnykh et al. 2001
168	RM439*	6	(AAT)13		0.72		248-281		tcataacagtccactccccc		tggtactccatcatcccatg		55		Temnykh et al. 2001
169	RM454	6	(GCT)8		0.67		249-292		ctcaagcttagctgctgctg		gtgatcagtgcaccatagcg		55		Temnykh et al. 2001
170	RM461	6	(AAAC)6		0.47		191-195		gagaccggagagacaactgc		tgatgcggtttgactgctac		55		Temnykh et al. 2001
171	RM469	6	(AG)15		0.64		93-105		agctgaacaagccctgaaag		gacttgggcagtgtgacatg		55		Temnykh et al. 2001
172	RM494	6	(AGA)16		0.49		175-203		gggaggggatcgagatagac		tttaaccttccttccgctcc		55		Temnykh et al. 2001
173	RM508	6	(AG)17		0.63		213-235		ggatagatcatgtgtggggg		acccgtgaaccacaaagaac		55		Temnykh et al. 2001
174	RM510	6	(GA)15		0.67		99-127		aaccggattagtttctcgcc		tgaggacgacgagcagattc		55		Temnykh et al. 2001
175	RM527	6	(GA)17		0.72		221-239		ggctcgatctagaaaatccg		ttgcacaggttgcgatagag		55		Temnykh et al. 2001
176	RM528	6	(AGAT)9		0.72		232-260		ggcatccaattttacccctc		aaatggagcatggaggtcac		55		Temnykh et al. 2001
177	RM539	6	(TAT) 21		0.87		272-302		gagcgtccttgttaaaaccg		agtagggtatcacgcatccg		55		Temnykh et al. 2001
178	RM540	6	(AG)16		0.72		162-172		gccttctggctcatttatgc		ctaggcctgccagattgaac		55		Temnykh et al. 2001
179	RM541*	6	(TC)16		0.86		156-192		tataaccgacctcagtgccc		ccttactcccatgccatgag		55		Temnykh et al. 2001
180	RM549	6	(CCG)9		0.57		145-154		acgaactgatcatatccgcc		ctgtggttgatccctgaacc		55		Temnykh et al. 2001
181	RM557	6	(AC)13		0.68		207-213		gtggcgagatctatgtggtg		gctttgtgtgtgtgtgtgtg		55		Temnykh et al. 2001
182	RM584	6	(CT)14		0.77		159-181		agaaagtggatcaggaaggc		gatcctgcaggtaaccacac		55		Temnykh et al. 2001
183	RM585	6	(TC)45		0.84		171-259		cagtcttgctccgtttgttg		ctgtgactgacttggtcatagg		55		Temnykh et al. 2001
184	RM587	6	(CTT)18		0.71		190-217		acgcgaacaaattaacagcc		ctttgctaccagtagatccagc		55		Temnykh et al. 2001
185	RM588	6	(TGC)9		0.52		114-126		gttgctctgcctcactcttg		aacgagccaacgaagcag		55		Temnykh et al. 2001
186	RM589*#	6	(GT)24		0.77		174-204		atcatggtcggtggcttaac		caggttccaaccagacactg		55		Temnykh et al. 2001
187	RM597	6	(CT)11		0.5		0,176		cctgatgcacaactgcgtac		tcagagagagagagagagagagag		55		Temnykh et al. 2001
188	RM2	7	(GA)13		na		na		acgtgtcaccgcttcctc		atgtccgggatctcatcg		na		Panaud et al. 1996
189	RM10	7	(GA)15		0.72		159-177		ttgtcaagaggaggcatcg		cagaatgggaaatgggtcc		55		Panaud et al. 1996
190	RM11*	7	(GA)17		0.83		118-151		tctcctcttcccccgatc		atagcgggcgaggcttag		55		Panaud et al. 1996
191	RM47	7	(AG)7-(AG)11		0.27		230-234		actccactccactccccac		gtcagcaggtcggacgtc		55		Chen et al. 1997
192	RM51	7	(GA)13		0.79		130-144		tctcgattcaatgtcctcgg		ctacgtcatcatcgtcttccc		55		Chen et al. 1997
193	RM70	7	(ATT)2		0.86		134-215		gtggacttcatttcaactcg		gatgtataagatagtccc		55		Chen et al. 1997
194	RM80	8	(TCT)25		0.81		116-173		ttgaaggcgctgaaggag		catcaacctcgtcttcaccg		55		Chen et al. 1997
195	RM82	7	(TCT)11		n.a.		108-120		tgcttcttgtcaattcgcc		cgactcgtggaggtacgg		55		Chen et al. 1997
196	RM118*	7	(GA)8		0.56		149-165		ccaatcggagccaccggagagc		cacatcctccagcgacgccgag		67		Temnykh et al. 2000
197	RM125	7	(GCT)8		0.61		105-147		atcagcagccatggcagcgacc		aggggatcatgtgccgaaggcc		55		Temnykh et al. 2000
198	RM172	7	(AGG)6		0.56		159-165		tgcagctgcgccacagccatag		caaccacgacaccgccgtgttg		55		Temnykh et al. 2000
199	RM180	7	(ATT)10		0.63		107-204		ctacatcggcttaggtgtagcaacacg		acttgctctacttgtggtgagggactg		55		Temnykh et al. 2000
200	RM214	7	(CT)14		0.71		114-152		ctgatgatagaaacctcttctc		aagaacagctgacttcacaa		55		Chen et al. 1997
201	RM234*	7	(CT)25		0.83		133-163		acagtatccaaggccctgg		cacgtgagacaaagacggag		55		Chen et al. 1997
202	RM248	7	(CT)25		0.82		80-104		tccttgtgaaatctggtccc		gtagcctagcatggtgcatg		55		Chen et al. 1997
203	RM295	7	(GA)2A(GA)3G2(GA)9		0.63		176-190		cgagacgagcatcggataag		gatctggtggaggggagg		55		Temnykh et al. 2000
204	RM320	7	(AT)11GTAT(GT)13		0.85		153-254		caacgtgatcgaggatagatc		ggatttgcttaccacagctc		55		Temnykh et al. 2000
205	RM336*	7	(CTT)18		0.79		148-193		cttacagagaaacggcatcg		gctggtttgtttcaggttcg		55		Temnykh et al. 2000
206	RM346*#	7	(CTT)18		0.75		140-175		cgagagagcccataactacg		acaagacgacgaggagggac		55		Bligh et al. 1999
207	RM418	7	(ATT)21		0.82		253-304		tcgcgtatcgtcatgcatag		gagcacatatgccacgtacg		55		Temnykh et al. 2001
208	RM420	7	(AAAT)7		0.54		181-197		ggacagaatgtgaagacagtcg		actaatccaccaacgcatcc		55		Temnykh et al. 2001
209	RM427	7	(TG)11		0.47		173-185		tcactagctctgccctgacc		tgatgagagttggttgcgag		55		Temnykh et al. 2001
210	RM429	7	(TG)10		0.74		139-185		tccctccagcaatgtctttc		ccttcatcttgctttccacc		55		Temnykh et al. 2001
211	RM432*	7	(CATC)9		0.69		167-187		ttctgtctcacgctggattg		agctgcgtacgtgatgaatg		55		Temnykh et al. 2001
212	RM436	7	(TAA)6		0.47		81-84		attcctgcagtaaagcacgg		cttcgtgtacctccccaaac		55		Temnykh et al. 2001
213	RM445	7	(AG)12		0.66		249-261		cgtaacatgcatatcacgcc		atatgccgatatgcgtagcc		55		Temnykh et al. 2001
214	RM455	7	(TTCT)5		0.5		127-144		aacaacccaccacctgtctc		agaaggaaaagggctcgatc		55		Temnykh et al. 2001
215	RM478	7	(AG)12		0.84		197-211		cagctggggaagagagagag		tcagaaactaaacgcacccc		55		Temnykh et al. 2001
216	RM481*#	7	(CAA)12		0.86		136-172		tagctagccgattgaatggc		ctccacctcctatgttgttg		55		Temnykh et al. 2001
217	RM500	7	(AAG)9		0.7		244-261		gagcttgccagagtggaaag		gttacaccgagagccagctc		55		Temnykh et al. 2001
218	RM505	7	(CT)12		0.54		179-203		agagttatgagccgggtgtg		gatttggcgatcttagcagc		55		Temnykh et al. 2001
219	RM533	7	(CT)16		0.68		257-259		gcaactgctctacgcctctc		cctgaggcttcacctactcg		55		Temnykh et al. 2001
220	RM542	7	(CT)22		0.71		91-113		tgaatcaagcccctcactac		ctgcaacgagtaaggcagag		55		Temnykh et al. 2001
221	RM560	7	(CT)12		0.66		235-241		gcaggaggaacagaatcagc		agcccgtgatacggtgatag		55		Temnykh et al. 2001
222	RM25*	8	(GA)18		0.82		121-159		ggaaagaatgatcttttcatgg		ctaccatcaaaaccaatgttc		55		Chen et al. 1997
223	RM38	8	(GA)16		0.73		246-278		acgagctctcgatcagccta		tcggtctccatgtcccac		55		Chen et al. 1997
224	RM44	8	(GA)16		0.64		82-132		acgggcaatccgaacaacc		tcgggaaaacctaccctacc		55		Chen et al. 1997
225	RM149	8	(AT)10		0.73		243-303		gctgaccaacgaacctaggccg		gttggaagcctttcctcgtaacacg		55		Akagi et al. 1996
226	RM152	8	(GGC)10		0.75		142-157		gaaaccaccacacctcaccg		ccgtagaccttcttgaagtag		55		Akagi et al. 1996
227	RM210	8	(CT)23		0.86		141-165		tcacattcggtggcattg		cgaggatggttgttcacttg		55		Chen et al. 1997
228	RM223*#	8	(CT)25		0.77		139-163		gagtgagcttgggctgaaac		gaaggcaagtcttggcactg		55		Chen et al. 1997
229	RM230	8	(AGG)4(GA)9A(AG)13		0.69		237-257		gccagaccgtggatgttc		caccgcagtcacttttcaag		55		Chen et al. 1997
230	RM264	8	GA)27		0.83		148-178		gttgcgtcctactgctacttc		gatccgtgtcgatgattagc		55		Temnykh et al. 2000
231	RM284*	8	(GA)8		0.63		139-159		atctctgatactccatccatcc		cctgtacgttgatccgaagc		55		Temnykh et al. 2000
232	RM310	8	(GT)19		0.83		85-120		ccaaaacatttaaaatatcatg		gcttgttggtcattaccattc		55		Temnykh et al. 2000
233	RM337	8	(CTT)4-19-(CTT)8		0.66		156-192		gtaggaaaggaagggcagag		cgatagatagctagatgtggcc		55		Temnykh et al. 2000
234	RM350	8	(CT)10		0.67		200-210		tgatcgtcgcgattcccggc		ccccaccctgcgcctctccc		55		Bligh et al. 1999
235	RM404*#	8	(GA)33		0.72		204-240		ccaatcattaacccctgagc		gccttcatgcttcagaagac		55		Temnykh et al. 2001
236	RM407	8	(AG)13		0.73		166-174		gattgaggagacgagccatc		ctttttcagatctgcgctcc		55		Temnykh et al. 2001
237	RM408*#	8	(CT)13		0.62		112-128		caacgagctaacttccgtcc		actgctacttgggtagctgacc		55		Temnykh et al. 2001
238	RM433*#	8	(AG)13		0.5		216-248		tgcgctgaactaaacacagc		agacaaacctggccattcac		55		Temnykh et al. 2001
239	RM447*	8	(CTT)8		0.67		95-146		cccttgtgctgtctcctctc		acgggcttcttctccttctc		55		Temnykh et al. 2001
240	RM477	8	(AATT)5		0.47		219-223		tctcgcggtatagtttgtgc		accactaccagcagcctctg		55		Temnykh et al. 2001
241	RM483	8	(AT)26		0.89		293-345		cttccaccataaaaccggag		acaccggtgatcttgtagcc		55		Temnykh et al. 2001
242	RM502	8	(TG)10		0.66		258-266		gcgatcgatggctacgac		acaacccaacaagaaggacg		55		Temnykh et al. 2001
243	RM515	8	(GA)11		0.79		205-231		taggacgaccaaagggtgag		tggcctgctctctctctctc		55		Temnykh et al. 2001
244	RM544	8	(TC)9		0.64		240-252		tgtgagcctgagcaataacg		gaagcgtgtgatatcgcatg		55		Temnykh et al. 2001
245	RM547	8	(ATT) 19		0.88		202-247		taggttggcagaccttttcg		gtcaagatcatcctcgtagcg		55		Temnykh et al. 2001
246	RM72	8	(TAT)5C(ATT)15		0.85		152-198		ccggcgataaaacaatgag		gcatcggtcctaactaaggg		55		Temnykh et al. 2000
247	RM41	9	(GA)15		n.a.		265		aagtctagtttgcctccc		aatttctacgtcgtcgggc		55		Chen et al. 1997
248	RM105	9	(CCT)6		0.76		131-140		gtcgtcgacccatcggagccac		tggtcgaggtggggatcgggtc		55		Temnykh et al. 2000
249	RM107	9	(GA)7		0.62		180-189		agatcgaagcatcgcgcccgag		actgcgtcctctgggttcccgg		67		Temnykh et al. 2000
250	RM108	9	(GGT)10		0.6		69-80		tctcttgcgcgcacactggcac		cgtgcaccaccaccaccaccac		67		Temnykh et al. 2000
251	RM160*#	9	(GAA)23		0.66		86-130		agctagcagctatagcttagctggagatcg		tctcatcgccatgcgaggcctc		55		Akagi et al. 1996
252	RM201	9	(CT)17		0.65		144-158		ctcgtttattacctacagtacc		ctacctcctttctagaccgata		55		Chen et al. 1997
253	RM205	9	(CT)25		0.7		123-161		ctggttctgtatgggagcag		ctggcccttcacgtttcagtg		55		Chen et al. 1997
254	RM215*#	9	(CT)16		0.63		126-161		caaaatggagcagcaagagc		tgagcacctccttctctgtag		55		Chen et al. 1997
255	RM219	9	(CT)17		0.85		192-222		cgtcggatgatgtaaagcct		catatcggcattcgcctg		55		Chen et al. 1997
256	RM242*	9	(CT)26		0.81		193-225		ggccaacgtgtgtatgtctc		tatatgccaagacggatggg		55		Chen et al. 1997
257	RM245	9	(CT)14		0.62		140-150		atgccgccagtgaatagc		ctgagaatccaattatctgggg		55		Chen et al. 1997
258	RM257*	9	(CT)24		0.73		121-173		cagttccgagcaagagtactc		ggatcggacgtggcatatg		55		Chen et al. 1997
259	RM278	9	(GA)17		0.77		131-146		gtagtgagcctaacaataatc		tcaactcagcatctctgtcc		55		Temnykh et al. 2000
260	RM285	9	(GA)12		0.65		203-213		ctgtgggcccaatatgtcac		ggcggtgacatggagaaag		55		Temnykh et al. 2000
261	RM288	9	(GA)7G6(GA)7		0.5		121-125		ccggtcagttcaagctctg		acgtacggacgtgacgac		55		Temnykh et al. 2000
262	RM296	9	(GA)10		0.43		117-123		cacatggcaccaacctcc		gccaagtcattcactactctgg		55		Temnykh et al. 2000
263	RM316*	9	(GT)8(TG)9(TTTG)4(TG)4		0.79		194-216		ctagttgggcatacgatggc		acgcttatatgttacgtcaac		55		Temnykh et al. 2000
264	RM321	9	(CAT)5		0.43		200-203		ccaacactgccactctgttc		gaggatggacaccttgatcg		55		Temnykh et al. 2000
265	RM328	9	(CAT)5		0.47		172-181		catagtggagtatgcagctgc		ccttctcccagtcgtatctg		55		Temnykh et al. 2000
266	RM409	9	(AGC)8		0.63		89-96		ccgtctcttgctagggattc		ggggtgttttgctttctctg		55		Temnykh et al. 2001
267	RM410	9	(TA)13		0.83		173-269		gctcaacgtttcgttcctg		gaagatgcgtaaagtgaacgg		55		Temnykh et al. 2001
268	RM434	9	(TC)12		0.63		148-164		gcctcatccctctaaccctc		caagaaagatcagtgcgtgg		55		Temnykh et al. 2001
269	RM444	9	(AT)12		0.83		162-226		gctccacctgcttaagcatc		tgaagaccatgttctgcagg		55		Temnykh et al. 2001
270	RM464	9	(AT)21		0.57		259-265		aacgggcacattctgtcttc		tggaagacctgatcgtttcc		55		Temnykh et al. 2001
271	RM553	9	(CT)10		0.69		158-170		aactccacatgattccaccc		gagaaggtggttgcagaagc		55		Temnykh et al. 2001
272	RM566*	9	(AG)15		0.85		230-306		acccaactacgatcagctcg		ctccaggaacacgctctttc		55		Temnykh et al. 2001
273	RM147	10	(TTCC)5(GGT)5		0.5		94-97		tacggcttcggcggctgattcc		cccccgaatcccatcgaaaccc		55		Temnykh et al. 2000
274	RM171	10	(GATG)5		0.74		318-343		aacgcgaggacacgtacttac		acgagatacgtacgcctttg		55		Akagi et al. 1996
275	RM184	10	(CA)7		0.66		207-221		atcccattcgccaaaaccggcc		tgacacttggagagcggtgtgg		55		Temnykh et al. 2000
276	RM216	10	(CT)18		0.72		127-143		gcatggccgatggtaaag		tgtataaaaccacacggcca		55		Chen et al. 1997
277	RM222	10	(CT)18		0.76		199-215		cttaaatgggccacatgcg		caaagcttccggccaaaag		55		Chen et al. 1997
278	RM228*	10	(CA)6(GA)36		0.83		108-154		ctggccattagtccttgg		gcttgcggctctgcttac		55		Chen et al. 1997
279	RM239	10	(AG)5TG(AG)2		0.46		143-147		tacaaaatgctgggtacccc		acatatgggacccacctgtc		55		Chen et al. 1997
280	RM244	10	(CT)4(CG)3C(CT)6		0.63		157-163		ccgactgttcgtccttatca		ctgctctcgggtgaacgt		55		Chen et al. 1997
281	RM258*#	10	(GA)21(GGA)3		0.76		133-152		tgctgtatgtagctcgcacc		tggcctttaaagctgtcgc		55		Chen et al. 1997
282	RM269	10	(GA)17		0.64		182-188		gaaagcgatcgaaccagc		gcaaatgcgcctcgtgtc		55		Temnykh et al. 2000
283	RM271	10	(GA)15		0.72		80-120		tcagatctacaattccatcc		tcggtgagacctagagagcc		55		Temnykh et al. 2000
284	RM294A	10	{(GT)3T2AGGGACA}2		n.a.		n.a.		ttggcctagtgcctccaatc		gagggtacaacttaggacgca		55		Temnykh et al. 2000
285	RM304	10	(GT)2(AT)10(GT)33		0.79		128-160		tcaaaccggcacatataagac		gatagggagctgaaggagatg		55		Temnykh et al. 2000
286	RM330A*	10	(CAT)5		n.a.		n.a.		caatgaagtggatctcggag		catcaatcagcgaaggtcc		55		Temnykh et al. 2000
287	RM333	10	(TAT)19(CTT)19		0.83		164-215		gtacgactacgagtgtcaccaa		gtcttcgcgatcactcgc		55		Temnykh et al. 2000
288	RM467	10	(TC)21		0.71		206-223		ggtctctctctctctctctctctc		ctcctgacaattcaactgcg		55		Temnykh et al. 2001
289	RM474	10	(AT)13		0.78		216-288		aagatgtacgggtggcattc		tatgagctggtgagcaatgg		55		Temnykh et al. 2001
290	RM484*#	10	(AT)9		0.6		286-298		tctccctcctcaccattgtc		tgctgccctctctctctctc		55		Temnykh et al. 2001
291	RM496	10	(TC)14		0.76		263-291		gacatgcgaacaacgacatc		gctgcggcgctgttatac		55		Temnykh et al. 2001
292	RM590*	10	(TCT)10		0.56		137-143		catctccgctctccatgc		ggagttggggtcttgttcg		55		Temnykh et al. 2001
293	RM591	10	(AC)10		n.a.		n.a.		ctagctagctggcaccagtg		tggagtccgtgttgtagtcg		55		Temnykh et al. 2001
294	RM4B	11	(AG)16		n.a.		149-159		ttgacgaggtcagcactgac		agggtgtatccgactcatcg		55		Panaud et al. 1996
295	RM21	11	(GA)18		0.88		132-170		acagtattccgtaggcacgg		gctccatgagggtggtagag		55		Panaud et al. 1996
296	RM116	11	(CT)9		0.59		274-278		tcacgcacagcgtgccgttctc		caagatcaagccatgaaaggaggg		55		Temnykh et al. 2000
297	RM120	11	(GA)9TAG(ATC)4		n.a.		n.a.		cacacaagccctgtctcacgacc		cgctgcgtcatgagtatgta		na		Wu &Tanksley 1993
298	RM139	11	(CT)5		0.63		396-410		gagagggaggaagggaggcggc		ctgccatggcagagaaggggcc		55		Temnykh et al. 2000
299	RM144	11	(ATT)11		0.76		214-255		tgccctggcgcaaatttgatcc		gctagaggagatcagatggtagtgcatg		55		Temnykh et al. 2000
300	RM181	11	(CT)13(AT)19		0.47		240-242		acgggagcttctccgacagcgc		tatgcttttgccgtgtgccgcg		67		Akagi et al. 1996
301	RM187	11	(AT)29(GT)7		0.84		136-164		ccaagggaaagatgcgacaattg		gtggacgctttatattatggg		55		Akagi et al. 1996
302	RM202*	11	(CT)30		n.a.		158-189		cagattggagatgaagtcctcc		ccagcaagcatgtcaatgta		55		Chen et al. 1997
303	RM206	11	(CT)21		0.88		128-202		cccatgcgtttaactattct		cgttccatcgatccgtatgg		55		Chen et al. 1997
304	RM209	11	(CT)18		0.77		127-165		atatgagttgctgtcgtgcg		caacttgcatcctcccctcc		55		Chen et al. 1997
305	RM20B	11	(ATT)n		n.a.		116-140		atcttgtccctgcaggtcat		gaaacagaggcacatttcattg		55		Panaud et al. 1996
306	RM224*	11	(AAG)8(AG)13		0.88		124-158		atcgatcgatcttcacgagg		tgctataaaaggcattcggg		55		Chen et al. 1997
307	RM229	11	(TC)11(CT)5C3(CT)5		0.83		106-131		cactcacacgaacgactgac		cgcaggttcttgtgaaatgt		55		Chen et al. 1997
308	RM254	11	(TC)6ATT(CT)11		n.a.		183-193		agccccgaataaatccacct		ctggaggagcatttggtagc		55		Chen et al. 1997
309	RM260	11	(CT)34		0.86		64-122		actccactatgacccagag		gaacaatcccttctacgatcg		55		Chen et al. 1997
310	RM286	11	(GA)16		0.72		99-128		ggcttcatctttggcgac		ccggattcacgagataaactc		55		Temnykh et al. 2000
311	RM287	11	(GA)21		0.83		82-118		ttccctgttaagagagaaatc		gtgtatttggtgaaagcaac		55		Temnykh et al. 2000
312	RM332	11	(CTT)5-12-(CTT)14		0.65		162-183		gcgaaggcgaaggtgaag		catgagtgatctcactcaccc		55		Temnykh et al. 2000
313	RM441*#	11	(AG)13		n.a		n.a		acaccagagagagagagagagag		tctgcaacggctgatagatg		55		Temnykh et al. 2001
314	RM457	11	(TTAA)5		0.43		228-232		ctccagcatggcctttctac		acctgatggtcaaagatggg		55		Temnykh et al. 2001
315	RM479	11	(TC)9		0.5		253-255		ccccttgctagcttttggtc		ccatacctcttctcctcccc		55		Temnykh et al. 2001
316	RM536*#	11	(CT)16		0.71		223-247		tctctcctcttgtttggctc		acacaccaacacgaccacac		55		Temnykh et al. 2001
317	RM552	11	(TAT)13		n.a.		167-258		cgcagttgtggatttcagtg		tgctcaacgtttgactgtcc		55		Temnykh et al. 2001
318	RM4A	12	(AG)n		n.a.		141-155		ttgacgaggtcagcactgac		agggtgtatccgactcatcg		55		Panaud et al. 1996
319	RM12*#	12	(GA)21		n.a.		162-184		tgccctgttattttcttctctc		ggtgatcctttcccatttca		55		Panaud et al. 1996
320	RM17	12	(GA)21		n.a.		162-184		tgccctgttattttcttctctc		ggtgatcctttcccatttca		55		Panaud et al. 1996
321	RM19	12	(ATC)10		n.a.		219-252		caaaaacagagcagatgac		ctcaagatggacgccaaga		55		Panaud et al. 1996
322	RM20A	12	(ATT)14		n.a.		162-198		atcttgtccctgcaggtcat		gaaacagaggcacatttcattg		55		Panaud et al. 1996
323	RM83	12	(TCA)6(TCT)8		n.a.		142		actcgatgacaagttgagg		cacctagacacgatcgag		55		Chen et al. 1997
324	RM101	12	(CT)37		0.59		258-334		gtgaatggtcaagtgacttaggtggc		acacaacatgttccctcccatgc		55		Temnykh et al. 2000
325	RM117	12	(AG)7		0.7		203-207		cgatccattcctgctgctcgcg		cgcccccatgcatgagaagacg		55		Temnykh et al. 2000
326	RM155	12	(CTT)7		0.52		271-273		gagatggccccctccgtgatgg		tgccctcaatcggccacacctc		55		Akagi et al. 1996
327	RM179	12	(TG)7		0.14		188-190		ccccattagtccactccaccacc		ccaatcagcctcatgcctcccc		61		Temnykh et al. 2000
328	RM235	12	(CT)24		0.81		96-134		agaagctagggctaacgaac		tcacctggtcagcctctttc		55		Chen et al. 1997
329	RM247	12	(CT)16		0.84		130-176		tagtgccgatcgatgtaacg		catatggttttgacaaagcg		55		Chen et al. 1997
330	RM270	12	(GA)13		0.29		104-117		ggccgttggttctaaaatc		tgcgcagtatcatcggcgag		55		Temnykh et al. 2000
331	RM277*	12	(GA)11		0.56		104-121		cggtcaaatcatcacctgac		caaggcttgcaagggaag		55		Temnykh et al. 2000
332	RM309*	12	(GT)13		0.39		165-169		gtagatcacgcacctttctgg		agaaggcctccggtgaag		55		Temnykh et al. 2000
333	RM313	12	(GT)6CA(CG)5-6-(GT)8		0.51		111-117		tgctacaagtgttcttcaggac		gctcaccttttgtgttccac		55		Temnykh et al. 2000
334	RM415	12	(AT)21		0.8		215-271		cttcgatccatcatccatgg		attgctgtacgcagtttcgg		55		Temnykh et al. 2001
335	RM453	12	(TC)10		0.77		172-184		cgcatctctctcccttatcg		ctctcctcctcgttgtcgtc		55		Temnykh et al. 2001
336	RM463	12	(TTAT)5		0.6		192-198		ttcccctccttttatggtgc		tgttctcctcagtcactgcg		55		Temnykh et al. 2001
337	RM511*	12	(GAC)7		0.49		118-133		cttcgatccggtgacgac		aacgaaagcgaagctgtctc		55		Temnykh et al. 2001
338	RM512	12	(TTTA)5		0.57		214-218		ctgcctttcttacccccttc		aacccctcgctggattctag		55		Temnykh et al. 2001
339	RM519*	12	(AAG)8		0.65		122-140		agagagcccctaaatttccg		aggtacgctcacctgtggac		55		Temnykh et al. 2001
340	RM558A	12	(ATTG)5		n.a.		246		gaactcctcgaactcgatgc		aggcattcaacctgttcgac		55		Temnykh et al. 2001
