# Supplementary material for: The Prehistoric Indian Ayurvedic Rice Shashtika Is an Extant Early Domesticate With a Distinct Selection History
Source: Front Plant Sci. 2018 Aug 14;9:1203. doi: 10.3389/fpls.2018.01203 (PMC6102419; doi:10.3389/fpls.2018.01203)
Supplement: Supplementary file 6 [file Table_5.XLSX]

## Sheet: 589 rice Summary
Supplementary Table 5. Summary statistics of diversity parameters computed (PowerMarker v. 3.25) from microsatellite data and the partitioning of total genetic diveristy (Fst) between the ancestral groups in rice and Njavara (GenAlEx 6.5)
Supplementary Table 5a. Summary statistics
Microsatellite locus	Sample Size	No. of obs.	Number of alleles	Major allele frequency	Gene Diversity	Heterozygosity	Poymorphism information content
RM1	589	589	24	0.205433	0.9017	0.00679117	0.894464
RM104	589	589	13	0.341256	0.756966	0.00679117	0.71887
RM109	589	589	11	0.290323	0.807446	0.00848896	0.780437
RM11	589	589	15	0.410866	0.755622	0.0101868	0.726441
RM118	589	589	6	0.496604	0.642502	0.00169779	0.585715
RM12	589	589	18	0.434635	0.755561	0.0101868	0.732466
RM124	589	589	6	0.657046	0.509661	0.00509338	0.457616
RM133	589	589	5	0.410866	0.652153	0.00339559	0.579181
RM135	589	589	6	0.48472	0.595878	0.00169779	0.515109
RM159	589	589	21	0.278438	0.857234	0.0305603	0.843609
RM160	589	589	19	0.401528	0.786766	0.0118846	0.76812
RM178	589	589	6	0.479626	0.664622	0.00169779	0.612397
RM202	589	589	18	0.325127	0.837005	0.0152801	0.822487
RM204	589	589	30	0.336163	0.794145	0.00848896	0.770263
RM215	589	589	12	0.285229	0.798121	0.00509338	0.768566
RM223	589	589	21	0.20798	0.868761	0.00848896	0.855477
RM224	589	589	15	0.190153	0.880892	0.0101868	0.869263
RM225	589	589	14	0.566214	0.614852	0.0101868	0.571296
RM228	589	589	33	0.267402	0.870525	0.00848896	0.859886
RM23	589	589	12	0.449066	0.698867	0.0118846	0.655966
RM231	589	589	13	0.396435	0.781352	0.00679117	0.759365
RM234	589	589	21	0.306452	0.818685	0.0118846	0.798373
RM242	589	589	23	0.409168	0.794165	0.00339559	0.780141
RM25	589	589	18	0.335314	0.780012	0.0118846	0.749729
RM250	589	589	20	0.347199	0.825413	0.00509338	0.810149
RM252	589	589	39	0.132428	0.941008	0.0135823	0.938018
RM257	589	589	28	0.303905	0.819187	0.00509338	0.798134
RM258	589	589	16	0.310696	0.833288	0.0118846	0.816153
RM266	589	589	32	0.16893	0.889238	0.49236	0.879149
RM277	589	589	8	0.633277	0.554903	0.0101868	0.51854
RM280	589	589	20	0.191002	0.887146	0.0101868	0.876701
RM283	589	589	14	0.457555	0.726307	0.0101868	0.696731
RM284	589	589	6	0.805603	0.339462	0.00169779	0.324405
RM293	589	589	8	0.383701	0.709892	0.00848896	0.658005
RM302	589	589	34	0.329372	0.795807	0.0101868	0.772933
RM309	589	589	10	0.466044	0.695888	0.0101868	0.655062
RM316	589	589	16	0.421053	0.718873	0.00848896	0.679176
RM330A	589	589	6	0.741087	0.421313	0.0848896	0.388776
RM336	589	589	26	0.178268	0.899751	0.0203735	0.891708
RM346	589	589	15	0.279287	0.807979	0.0135823	0.782054
RM404	589	589	23	0.250424	0.867101	0.0780985	0.854482
RM408	589	589	9	0.475382	0.709879	0.00509338	0.677982
RM423	589	589	13	0.241935	0.819901	0.0203735	0.796896
RM424	589	589	17	0.219015	0.872389	0.0186757	0.860177
RM430	589	589	23	0.483871	0.624778	0.00679117	0.558268
RM431	589	589	13	0.342954	0.755637	0.00679117	0.720848
RM432	589	589	6	0.754669	0.402053	0.00509338	0.36955
RM433	589	589	14	0.393888	0.7844	0.0271647	0.763436
RM439	589	589	21	0.362479	0.815524	0.00169779	0.799395
RM440	589	589	26	0.169779	0.9008	0.00339559	0.892697
RM441	589	589	12	0.406621	0.746558	0.00509338	0.712711
RM447	589	589	14	0.263158	0.840833	0.0118846	0.82213
RM452	589	589	9	0.393039	0.674789	0.00848896	0.608864
RM48	589	589	26	0.231749	0.855079	0.0118846	0.839275
RM481	589	589	30	0.12309	0.93601	0.0322581	0.932446
RM484	589	589	6	0.420204	0.671486	0.0305603	0.611435
RM507	589	589	5	0.572156	0.506392	0.00679117	0.397476
RM511	589	589	10	0.324278	0.747538	0.00169779	0.705561
RM514	589	589	13	0.296265	0.796083	0.0101868	0.770014
RM517	589	589	18	0.235144	0.842196	0.00169779	0.824019
RM518	589	589	20	0.209677	0.893725	0.0118846	0.885185
RM519	589	589	9	0.432088	0.717927	0.0101868	0.678382
RM536	589	589	10	0.501698	0.668978	0.00848896	0.626374
RM541	589	589	30	0.151104	0.917122	0.00509338	0.911254
RM545	589	589	18	0.373514	0.807966	0.0101868	0.791201
RM551	589	589	31	0.320034	0.849849	0.0101868	0.838482
RM566	589	589	37	0.254669	0.889724	0.0152801	0.882152
RM567	589	589	12	0.429542	0.704283	0.00679117	0.661063
RM589	589	589	31	0.248727	0.880357	0.0152801	0.870985
RM590	589	589	8	0.489813	0.657467	0.0169779	0.604608
Mean	589	589	17.0286	0.364092	0.760654	0.0190153	0.731833
Supplementary Table 5b. Pair-wise Fst (p < 0.05) between ancestral sub-groups and Njavara
Ancestral groups	aromatic	aus	indica	japonica	Njavara
aromatic	0
aus	0.158274	0
indica	0.167997	0.144482	0
japonica	0.0999643	0.183511	0.199025	0
Njavara	0.216092	0.130127	0.24393	0.229919	0
