# Supplementary material for: The Prehistoric Indian Ayurvedic Rice Shashtika Is an Extant Early Domesticate With a Distinct Selection History
Source: Front Plant Sci. 2018 Aug 14;9:1203. doi: 10.3389/fpls.2018.01203 (PMC6102419; doi:10.3389/fpls.2018.01203)
Supplement: Supplementary file 8 [file Table_7.XLSX]

## Sheet: Sheet1
Supplementary Table 7. Nucleotide diveristy (θ, π), and haploid diversity (h, Hd) and test of neutrality at each STS loci. No locus showed significant deviation from neutral expections in both rice and O. rufipogon. All the sequences were used for genealogical analysis.
Sl. No.	STS loci	No. of sequences	No. of sites	Number of of sites used in analysis	No. of segregating sites (S)	Average number of nucleotide differences (k)	Watterson's θ	π	No. of haplotypes (h)	Haplotype diversity (Hd)	Neutrality tests
											Rice			O. rufipogon
											Tajima's D	Fu & Li's D	Fu & Li's F	Tajima's D	Fu & Li's D	Fu & Li's F
1	STS_004	178	463	368	25	2.81	0.0118	0.00763	28	0.594	-0.74304	0.24476	-0.15914	-0.43115	-0.83084	-0.82202
2	STS_011	186	529	529	9	0.314	0.00293	0.00059	9	0.293	-1.0146	-0.65823	-0.90958	-1.51434	-1.36979	-1.65796
3	STS_023	186	504	504	12	1.566	0.0041	0.00311	13	0.658	1.20834	-0.09457	0.40154	-1.22077	-1.95559	-2.02075
4	STS_024	184	521	494	8	1.204	0.0028	0.00245	12	0.735	1.94923	0.80111	1.37614	-0.94201	-0.59711	-0.83374
5	STS_025	186	490	486	6	0.747	0.00213	0.00154	7	0.466	-1.25211	-3.40652*	-3.18087*	1.11605	0.14932	0.52489
6	STS_031	186	476	434	10	0.736	0.00397	0.0017	16	0.612	-0.00244	0.91311	0.72433	-1.83328*	-2.8354*	-2.95437*
7	STS_040	186	483	480	10	0.673	0.00359	0.00142	11	0.454	-0.63831	0.66095	0.29806	-1.52134	-2.8354*	-2.83457*
8	STS_047	184	549	549	9	0.984	0.00252	0.00179	10	0.674	-0.26793	-2.30254	-1.9221	-0.62197	-0.27664	-0.45245
9	STS_052	184	516	513	13	1.897	0.00438	0.0037	17	0.733	1.17135	-0.89531	-0.23232	-0.65669	-0.65119	-0.77043
10	STS_065	186	429	339	8	1.071	0.00407	0.00316	9	0.477	-0.03857	0.91311	0.71038	-0.18646	-1.83133	-1.53619
11	STS_066	186	522	313	8	0.995	0.00441	0.00319	21	0.57	-0.04587	0.79148	0.58097	-0.42877	-0.10516	-0.2455
12	STS_070	186	502	498	4	0.438	0.00138	0.00088	9	0.422	1.29649	0.47307	0.84753	-0.93747	-0.08153	-0.40001
13	STS_072	185	401	266	5	1.05	0.00324	0.00395	16	0.518	2.51641*	0.66095	1.45849	-0.2635	0.48112	0.28771
14	STS_080	185	449	449	9	0.765	0.00346	0.0017	9	0.563	-0.11896	-0.33372	-0.31101	-1.0525	-1.83133	-1.85881
15	STS_085	185	533	482	32	3.533	0.01146	0.00733	31	0.854	0.57478	-0.14809	0.14551	-1.63066	-2.96038*	-2.96274*
16	STS_087	186	408	408	4	0.137	0.00169	0.00034	5	0.094	_	_	_	-0.99855	-0.08153	-0.42177
17	STS_089	186	533	277	9	1.705	0.0056	0.00615	23	0.735	0.90372	0.25566	0.56783	-0.16595	-1.36979	-1.16212
18	STS_099	181	472	468	18	2.362	0.00666	0.00505	10	0.666	1.00083	-1.19856	-0.55118	0.55512	0.81432	0.86
19	STS_108	185	485	484	11	0.377	0.00392	0.00078	7	0.224	_	_	_	-1.51385	-0.25769	-0.79017
* p < 0.05
