# Supplementary material for: The Prehistoric Indian Ayurvedic Rice Shashtika Is an Extant Early Domesticate With a Distinct Selection History
Source: Front Plant Sci. 2018 Aug 14;9:1203. doi: 10.3389/fpls.2018.01203 (PMC6102419; doi:10.3389/fpls.2018.01203)
Supplement: Supplementary file 10 [file Table_9.XLSX]

## Sheet: Sheet1
Supplementary Table 9. Distribution of major nuclear gene haplotypes among Njavara and other rice cultivars and O. rufipogon accessions. Sequence tagged site (STS) locus name and haplotype number are as in Supplementary Table 7. SB I, SB III, IY and LY/SY represent the Njavara accessions belonging to Short black I, Short black III, Intermediate yellow and Long yellow/Short yellow genotypic classe…
Sl No.	Name of the locus (Chromosome Number in parenthesis)		Haplotype number		Distribution
1	STS 047 (I)		1		All Njavara genotypes, Njavara like individuals, most of the aus, O. rufipogon from Malaysia, Sri Lanka, Andhra Pradesh (India), Madhya Pradesh (India), Maharashtra (India), Odisha (India).
2	STS 023 (III)		1		All IY, LY/SY, japonica, aromatic,O. rufipogon from China and Odisha (India).
3	STS 023 (III)		2		All SB I, SB III, most of Njavara like individuals, all aus, most of indica, O. rufipogon from Malaysia, Myanmar, Sri Lanka, Andhra Pradesh (India), Chhattisgarh (India), Odisha (India), West Bengal (India)
4	STS 099 (III)		2		All Njavara genotypes, Njavara like individuals, most of the aus and O. rufipogon from Malaysia, Andhra Pradesh (India), Chhattisgarh (India), Maharashtra (India).
5	STS 025 (V)		1		All Njavara genotypes, all Njavara like, au, japonica, aromati, O. rufipogon from Bangladesh, Cambodia, China, Indonesia, Laos, Malaysia, Myanmar, Pau New Guinea, Thailand, Andhra Pradesh (India), Chhattisgarh (India), Madhya Pradesh (India), Odisha (India), Uttar Pradesh (India), West Bengal (India)
6	STS 024 (VI)		2		SB I, Njavara like individuals, O. rufipogon from Malaysia, Andhra Pradesh, Odisha (India).
7	STS 024 (VI)		3		SB I, IY, LY/SY,O. rufipogon from Cambodia, China, Philippines, Sri Lanka
8	STS 031 (VI)		1		SB I, a three SB III Njavara genotypes, a few Njavara like individuals, all aus, all indica, O. rufipogon from Bangladesh, Cambodia, China, Indonesia, Laos, Pau New Guinea, Philippines, Sri Lanka, Thailand and most of the Indian states
9	STS 031 (VI)		6		A few SB III
10	STS 066 (VII)		1		All Njavara genotypes, a few aus, japonica
11	STS 004 (VIII)		1		All Njavara genotypes, a few Njavara like, most of aus, all japonica, all aromatic, O. rufipogon from Cambodia, Malaysia, Philippines, Karnataka (India), Andhra Pradesh (India), Madhya Pradesh (India), Maharashtra (India), Uttar Pradesh (India), West Bengal (India)
12	STS 080 (IX)		1		All Njavara genotypes, a few Njavara like, all japonica,all aromatic, O. rufipogon from China, Indonesia, Philippines, Sri Lanka, Thailand, Karnataka (India), Odisha (India), Tamil Nadu (India), West Bengal (India)
13	STS 070 (X)		2		SBI I, a few SB III, a few IY Njavara genotypes, Njavara like individuals, aus, O. rufipogon from Malaysia, Thailand, Andhra Pradesh (India), Madhya Pradesh (India), Maharashtra (India)
14	STS 070 (X)		1		A few SB III, all LY/SY, most of aus, all japonica, all aromatic,all indica, O. rufipogon several countries and Indian states
15	STS 072 (XI)		2		SB I, a few of SB III, all LY/SY
16	STS 089 (XI)		1		IY, LY/SY
17	STS 052 (XII)		2		All SB I, a few Njavara like, most of the aus, a few indica, O. rufipogon from Bangladesh, China, Laos, Malaysia, Thailand, Andhra Pradesh (India), Madhya Pradesh (India), Maharashtra (India), Odisha (India), West Bengal (India)
18	STS 052 (XII)		3		All LY/SY
19	STS 085 (XII)		2		All SBI, a few IY, a few Njavara like individuals, most of the aus,O. rufipogon from Malaysia, Andhra Pradesh (India), Madhya Pradesh (India), Maharashtra (India), Odisha (India)
